# Supplementary material for: Sirtuin 1: A Dilemma in Transplantation
Source: Hindawi journal article supplement (doi:10.1155/2020/9012980), 2020-04-25

Graphical abstract

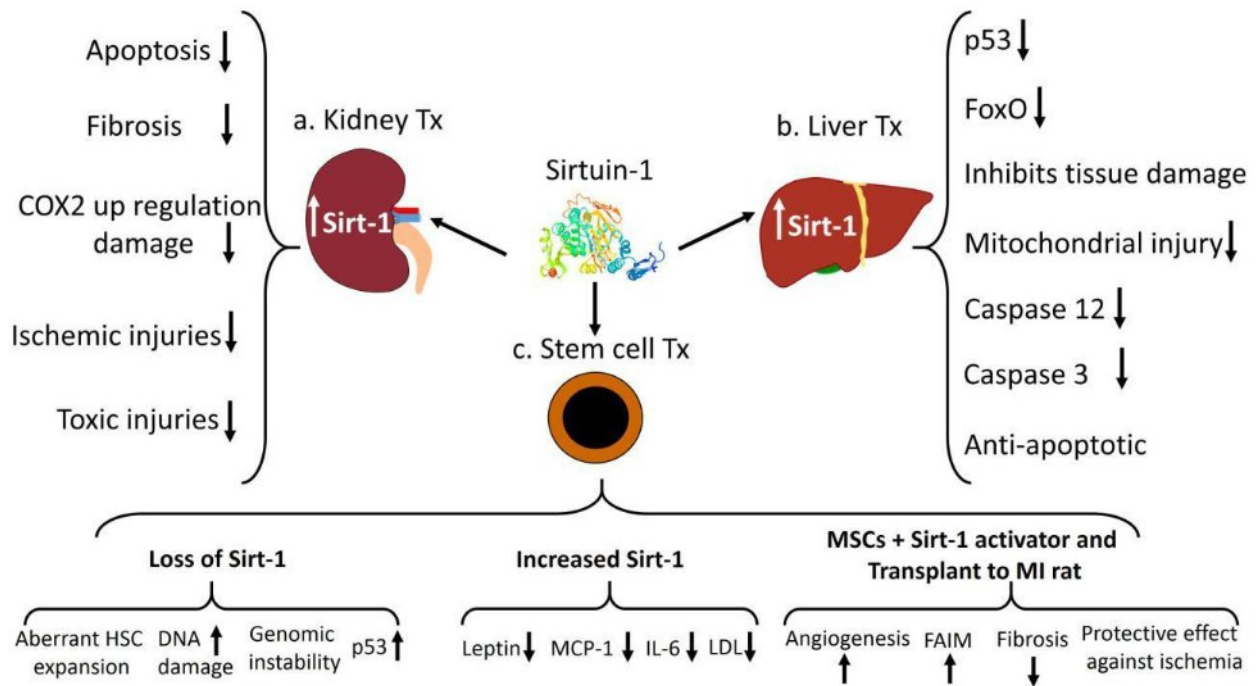

Supplement: f1 [file 9012980.f1.pdf]
